# Supplementary material for: Anomalous magnetic behaviour induced by a structural phase transition with anisotropic thermal expansion in a spirodiradical
Source: Royal Society of Chemistry journal article supplement (doi:10.1039/d4qo01098a), 2024-01-01
Supplement: d4qo01098a1.pdf [file d4qo01098a1.pdf]

**Anomalous Magnetic Behaviour Induced by  
a Structural Phase Transition with Anisotropic  
Thermal Expansion in a Spirodiradical**

Takuya Kanetomo,\* Daigo Matsunaga, Shinichi Ogawa and Masaya Enomoto\*

Department of Chemistry, Faculty of Science Division 1,

Tokyo University of Science, 1-3 Kagurazaka, Shinjuku-ku, Tokyo, 162-8603, Japan

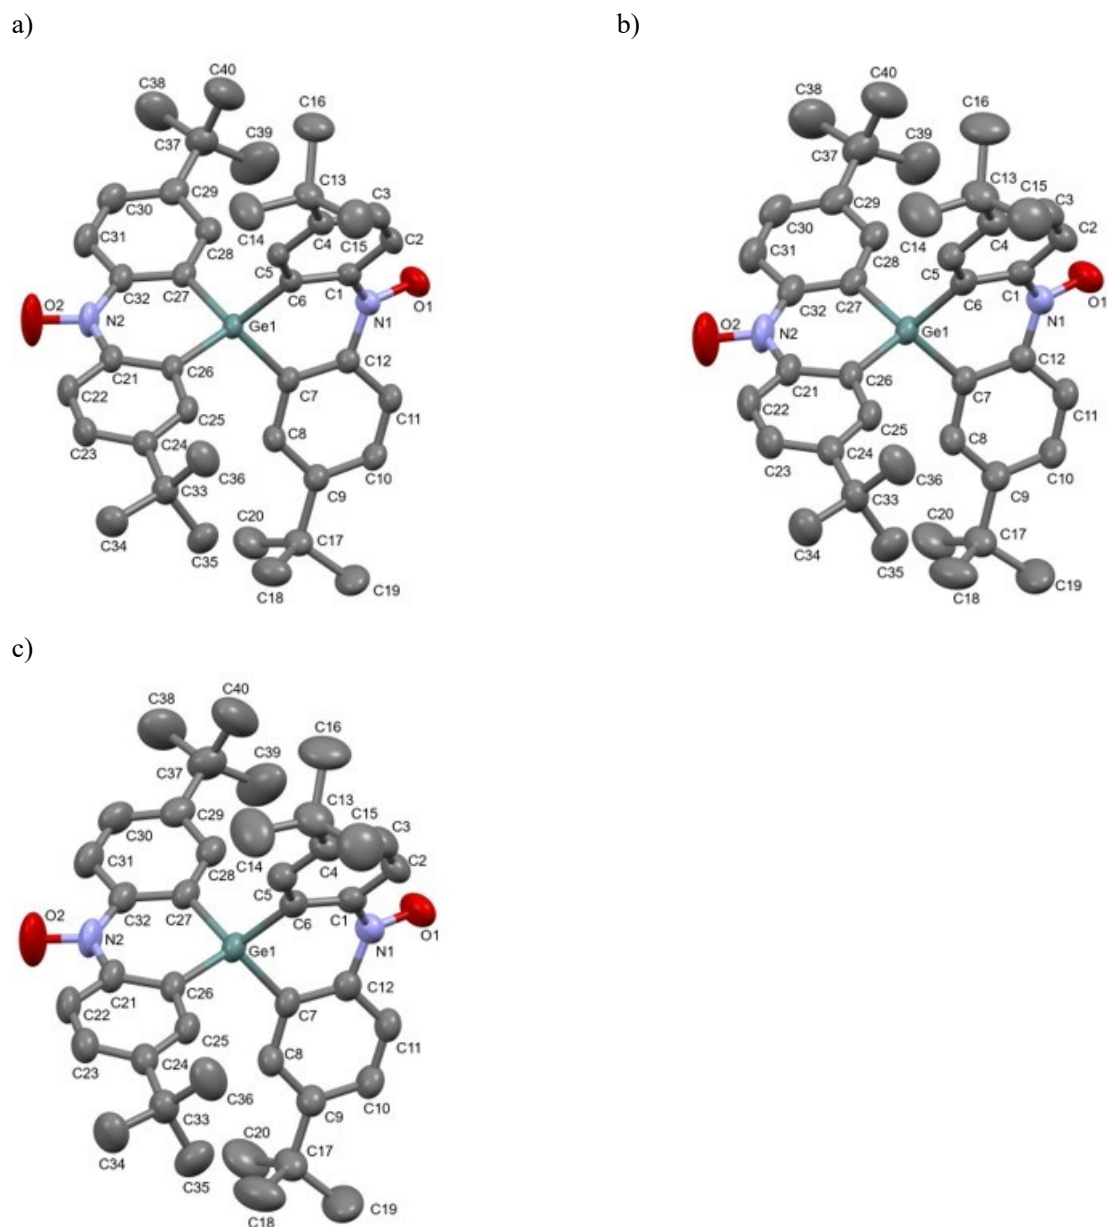

**Fig. S1.** Crystal structures for **1-Ge** at (a) 220, (b) 250 and (c) 280 K. Thermal ellipsoids for non-hydrogen atoms are drawn at the 50% probability level. The H atoms are omitted for clarity. (b,c) The major configuration is shown in disordered *tert*-butyl groups (C14/C15/C16 and C39).

**Table S1.** Cell parameters for **1-Ge** in 90–300 K.

| <b><i>T</i> / K</b>      | <b>90</b>   | <b>100</b>  | <b>110</b>  | <b>120</b>  | <b>130</b>  | <b>140</b>  |
|--------------------------|-------------|-------------|-------------|-------------|-------------|-------------|
| <i>a</i> /Å              | 12.404(5)   | 12.423(5)   | 12.429(5)   | 12.450(5)   | 12.464(5)   | 12.445(7)   |
| <i>b</i> /Å              | 25.416(8)   | 25.431(9)   | 25.422(10)  | 25.439(9)   | 25.442(9)   | 25.376(14)  |
| <i>c</i> /Å              | 11.303(5)   | 11.311(5)   | 11.316(6)   | 11.331(5)   | 11.341(5)   | 11.316(8)   |
| $\beta$ /°               | 105.385(9)  | 105.378(10) | 105.360(10) | 105.355(11) | 105.359(10) | 105.334(14) |
| <i>V</i> /Å <sup>3</sup> | 3436(4)     | 3446(4)     | 3448(4)     | 3461(4)     | 3468(4)     | 3446(6)     |
| <b><i>T</i> / K</b>      | <b>150</b>  | <b>160</b>  | <b>170</b>  | <b>180</b>  | <b>190</b>  | <b>200</b>  |
| <i>a</i> /Å              | 12.481(5)   | 12.511(5)   | 12.503(3)   | 12.526(3)   | 12.540(3)   | 12.566(4)   |
| <i>b</i> /Å              | 25.418(10)  | 25.445(9)   | 25.404(6)   | 25.410(6)   | 25.388(6)   | 25.379(6)   |
| <i>c</i> /Å              | 11.348(6)   | 11.369(6)   | 11.349(4)   | 11.363(3)   | 11.364(4)   | 11.378(4)   |
| $\beta$ /°               | 105.336(10) | 105.324(9)  | 105.277(7)  | 105.274(7)  | 105.275(8)  | 105.296(7)  |
| <i>V</i> /Å <sup>3</sup> | 3472(5)     | 3490(4)     | 3478(3)     | 3489(3)     | 3490(3)     | 3500(3)     |
| <b><i>T</i> / K</b>      | <b>210</b>  | <b>220</b>  | <b>230</b>  | <b>240</b>  | <b>250</b>  | <b>255</b>  |
| <i>a</i> /Å              | 12.588(3)   | 12.626(3)   | 12.680(4)   | 12.744(11)  | 13.162(5)   | 13.178(6)   |
| <i>b</i> /Å              | 25.345(5)   | 25.316(6)   | 25.291(8)   | 25.20(2)    | 24.563(8)   | 24.547(11)  |
| <i>c</i> /Å              | 11.378(3)   | 11.390(3)   | 11.410(5)   | 11.419(13)  | 11.509(5)   | 11.510(7)   |
| $\beta$ /°               | 105.321(7)  | 105.322(7)  | 105.403(8)  | 105.53(2)   | 106.643(10) | 106.667(13) |
| <i>V</i> /Å <sup>3</sup> | 3501(3)     | 3511(3)     | 3528(4)     | 3533(10)    | 3565(4)     | 3567(5)     |
| <b><i>T</i> / K</b>      | <b>260</b>  | <b>265</b>  | <b>270</b>  | <b>275</b>  | <b>280</b>  | <b>285</b>  |
| <i>a</i> /Å              | 13.18(2)    | 13.219(15)  | 13.224(4)   | 13.213(12)  | 13.23(2)    | 13.249(3)   |
| <i>b</i> /Å              | 24.54(4)    | 24.58(3)    | 24.562(8)   | 24.50(3)    | 24.48(4)    | 24.570(6)   |
| <i>c</i> /Å              | 11.51(2)    | 11.539(15)  | 11.547(4)   | 11.498(12)  | 11.50(2)    | 11.570(3)   |
| $\beta$ /°               | 106.68(5)   | 106.66(3)   | 106.652(8)  | 106.88(2)   | 106.69(4)   | 106.604(5)  |
| <i>V</i> /Å <sup>3</sup> | 3569(17)    | 3591(13)    | 3593(3)     | 3562(10)    | 3568(18)    | 3609(2)     |
| <b><i>T</i> / K</b>      | <b>290</b>  | <b>295</b>  | <b>300</b>  |             |             |             |
| <i>a</i> /Å              | 13.22(5)    | 13.267(3)   | 13.269(3)   |             |             |             |
| <i>b</i> /Å              | 24.50(10)   | 24.571(7)   | 24.572(7)   |             |             |             |
| <i>c</i> /Å              | 11.53(5)    | 11.586(3)   | 11.591(4)   |             |             |             |
| $\beta$ /°               | 106.92(8)   | 106.566(6)  | 106.539(6)  |             |             |             |
| <i>V</i> /Å <sup>3</sup> | 3570(40)    | 3620(3)     | 3623(3)     |             |             |             |

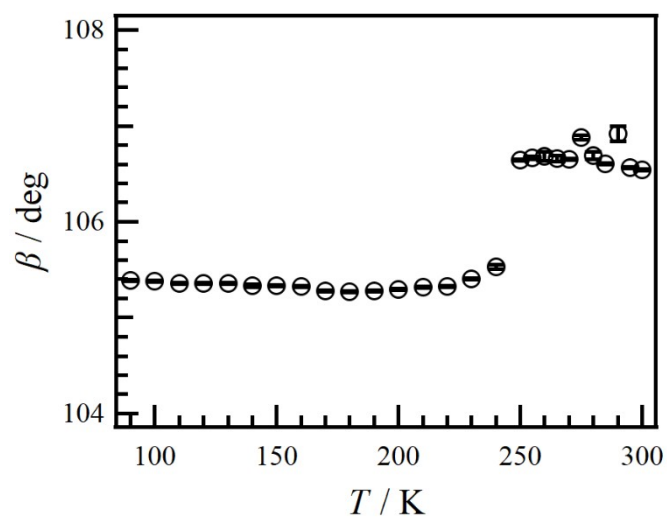

**Fig. S2.**  $T$ -dependence of cell parameter  $\beta$ .

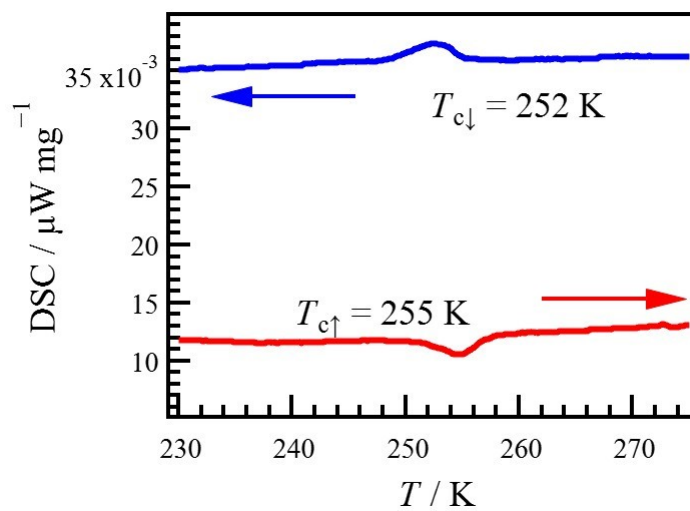

**Fig. S3.** DSC curves for 1-Ge.

**Table S2.** Intramolecular structural parameters.

| <i>T</i> / K                               | 93 <sup>a</sup> | 220      | 250      | 280      |
|--------------------------------------------|-----------------|----------|----------|----------|
| N1–O1 / Å                                  | 1.2868(15)      | 1.284(3) | 1.284(3) | 1.281(3) |
| N2–O2 / Å                                  | 1.2846(16)      | 1.283(4) | 1.285(4) | 1.292(4) |
| Ge1–C6 / Å                                 | 1.944(1)        | 1.940(2) | 1.942(3) | 1.946(3) |
| Ge1–C7 / Å                                 | 1.945(2)        | 1.943(2) | 1.942(3) | 1.939(4) |
| Ge1–C26 / Å                                | 1.934(1)        | 1.929(2) | 1.923(3) | 1.926(3) |
| Ge1–C27 / Å                                | 1.942(2)        | 1.943(3) | 1.941(3) | 1.939(3) |
| $\phi_1$ (spiro) <sup>b</sup> / deg        | 84.99           | 86.07    | 87.21    | 87.54    |
| $\phi_2$ (acridine; N1) <sup>c</sup> / deg | 40.20           | 40.24    | 39.29    | 39.06    |
| $\phi_2$ (acridine; N2) <sup>c</sup> / deg | 4.61            | 4.44     | 6.14     | 6.31     |

<sup>a</sup> Ref. [S1]. <sup>b</sup> The torsion angle  $\phi_1$  is defined as the angle between two dihydroacridine moieties (each 15 atoms) within the same molecule. <sup>c</sup> The torsion angle  $\phi_2$  is defined as the angle between two terminal phenyl rings (each 6 atoms) within the same dihydroacridine.

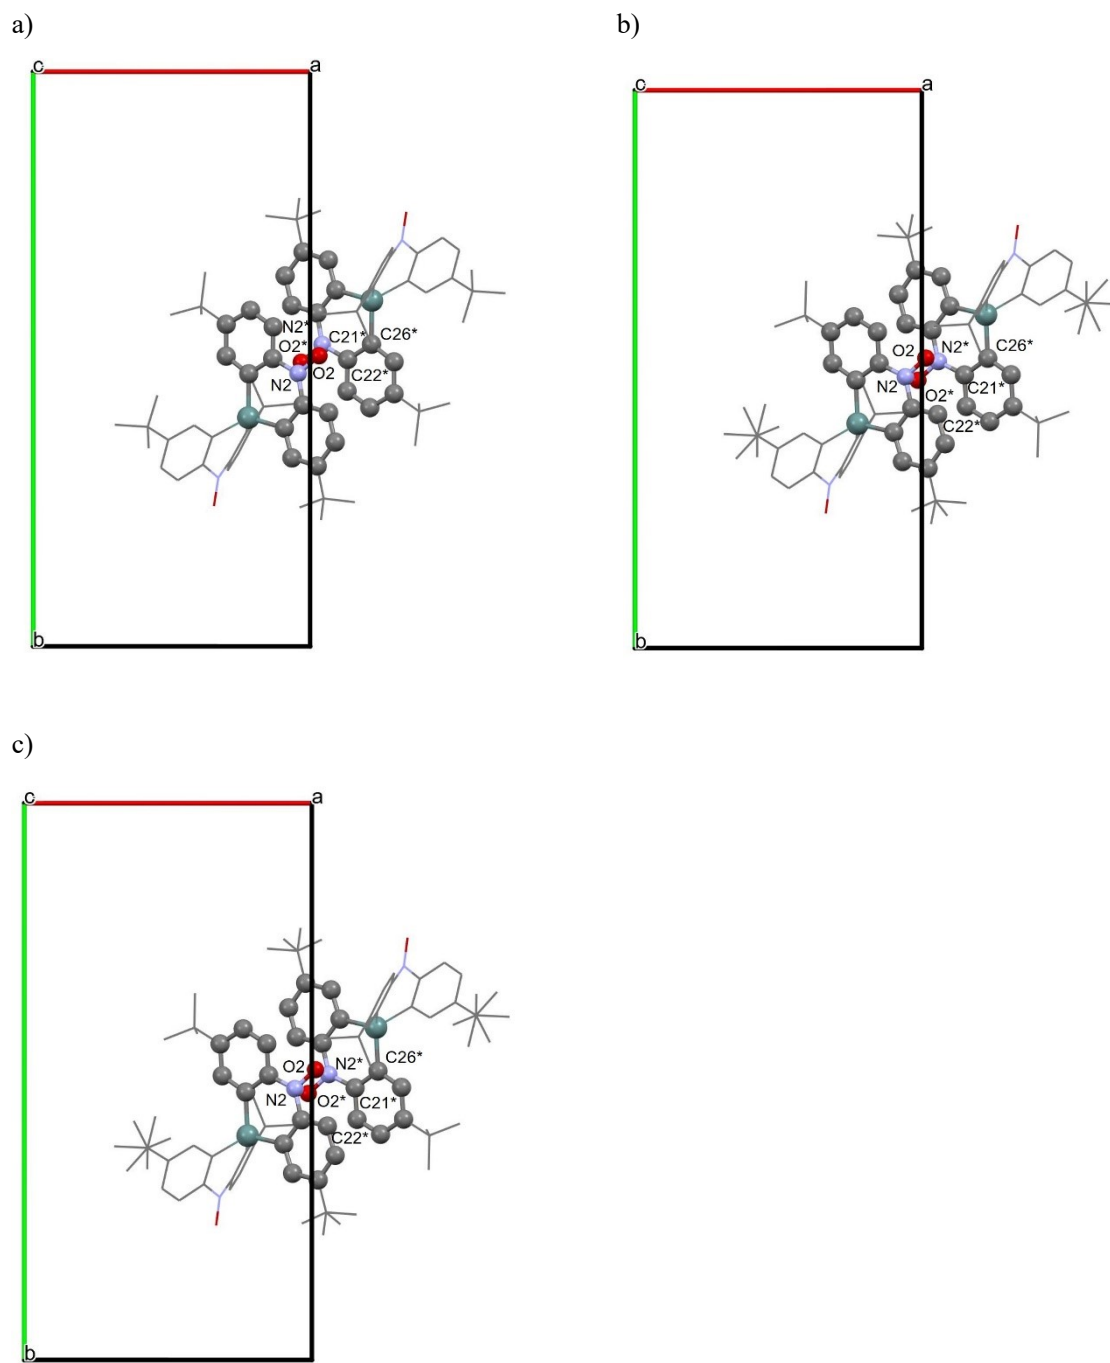

**Fig. S4.** The structures of the dimer (i) at (a) 220, (b) 250 and (c) 280 K. The symmetric code of \* is  $2-x, 1-y, 1-z$ .

**Table S3.** Intermolecular structural parameters.

| <i>T</i> / K | 93 <sup>a</sup> | 220      | 250      | 280      |
|--------------|-----------------|----------|----------|----------|
| N2···C21 / Å | 3.455(2)        | 3.484(3) | 3.460(4) | 3.479(4) |
| N2···C22 / Å | 3.396(2)        | 3.530(3) | 3.781(4) | 3.828(4) |
| N2···C26 / Å | 3.985(2)        | 4.017(3) | 4.061(3) | 4.076(3) |
| O2···C21 / Å | 3.340(2)        | 3.349(4) | 3.260(4) | 3.268(5) |
| O2···C22 / Å | 3.602(2)        | 3.709(4) | 3.892(4) | 3.931(5) |
| O2···C26 / Å | 3.395(2)        | 3.415(3) | 3.405(3) | 3.411(4) |
| N2···O2 / Å  | 3.847(2)        | 3.732(4) | 3.303(5) | 3.270(6) |
| N2···N2 / Å  | 3.739(2)        | 3.644(3) | 3.273(4) | 3.252(4) |
| O2···O2 / Å  | 4.349(3)        | 4.227(5) | 3.795(5) | 3.761(6) |
| O2···C8 / Å  | 3.138(2)        | 3.132(4) | 3.081(4) | 3.080(4) |

<sup>a</sup> Ref. [S1].

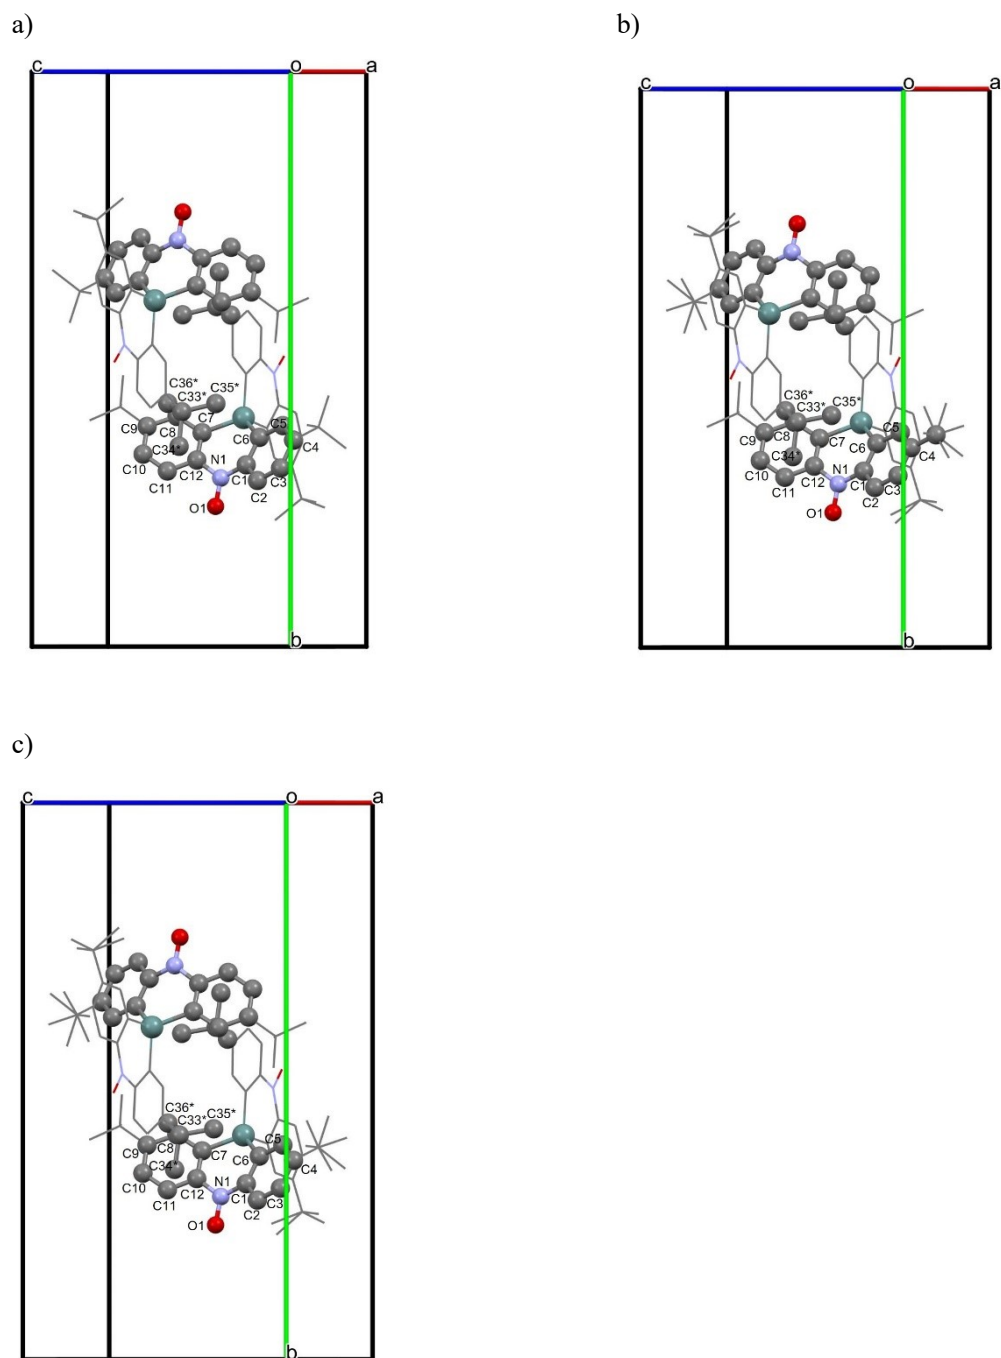

**Fig. S5.** The structures of the dimer (ii) at (a) 220, (b) 250 and (c) 280 K. The symmetric code of \* is  $1-x, 1-y, 1-z$ .



**Table S4.** Intermolecular structural parameters.

| <i>T</i> / K  | 93 <sup>a</sup> | 220      | 250      | 280      |
|---------------|-----------------|----------|----------|----------|
| C19...C27 / Å | 3.727(2)        | 3.823(4) | 3.892(4) | 3.921(5) |
| C19...C28 / Å | 3.891(2)        | 4.004(4) | 4.001(5) | 4.022(5) |
| C19...C32 / Å | 3.737(2)        | 3.790(4) | 3.895(5) | 3.918(5) |
| C20...C31 / Å | 3.845(2)        | 3.943(5) | 4.061(5) | 4.105(6) |
| <hr/>         |                 |          |          |          |
| C35...C5 / Å  | 3.823(3)        | 3.859(5) | 3.925(5) | 3.941(7) |
| C35...C6 / Å  | 3.861(2)        | 3.922(5) | 3.970(5) | 3.984(6) |
| C36...C7 / Å  | 3.745(2)        | 3.783(4) | 3.783(5) | 3.795(5) |
| C36...C8 / Å  | 3.700(2)        | 3.741(4) | 3.769(5) | 3.782(5) |
| C36...C9 / Å  | 3.686(2)        | 3.746(3) | 3.809(5) | 3.829(5) |
| C36...C10 / Å | 3.718(2)        | 3.783(4) | 3.843(5) | 3.864(5) |
| C36...C11 / Å | 3.757(2)        | 3.818(4) | 3.849(5) | 3.868(5) |
| C36...C12 / Å | 3.737(2)        | 3.787(4) | 3.798(5) | 3.814(5) |
| <hr/>         |                 |          |          |          |
| C39...C9 / Å  | 3.791(3)        | 3.975(6) | 3.96(2)  | 4.06(2)  |
| C39...C10 / Å | 3.759(3)        | 3.899(6) | 3.84(2)  | 3.93(2)  |
| C40...C7 / Å  | 3.669(2)        | 3.717(5) | 3.815(6) | 3.837(6) |
| C40...C11 / Å | 3.644(3)        | 3.606(5) | 3.592(6) | 3.587(7) |
| C40...C12 / Å | 3.390(2)        | 3.445(4) | 3.492(6) | 3.512(6) |
| C40...C28 / Å | 3.745(3)        | 3.896(5) | 4.077(7) | 4.131(7) |

<sup>a</sup> Ref. [S1].

a)

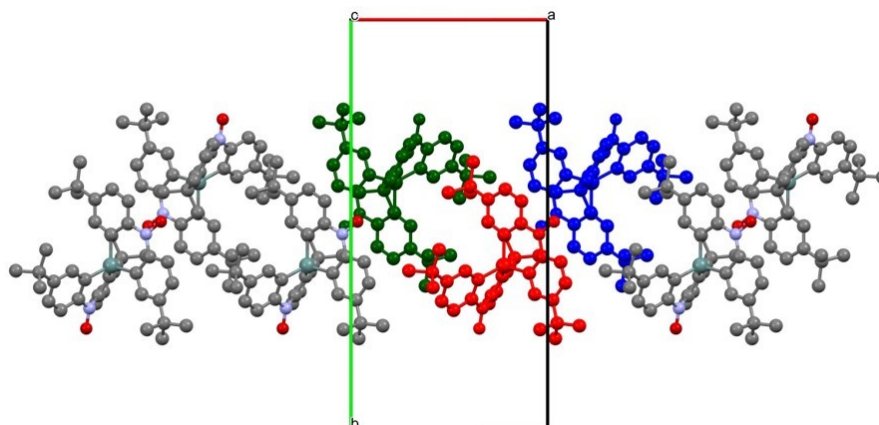

b)

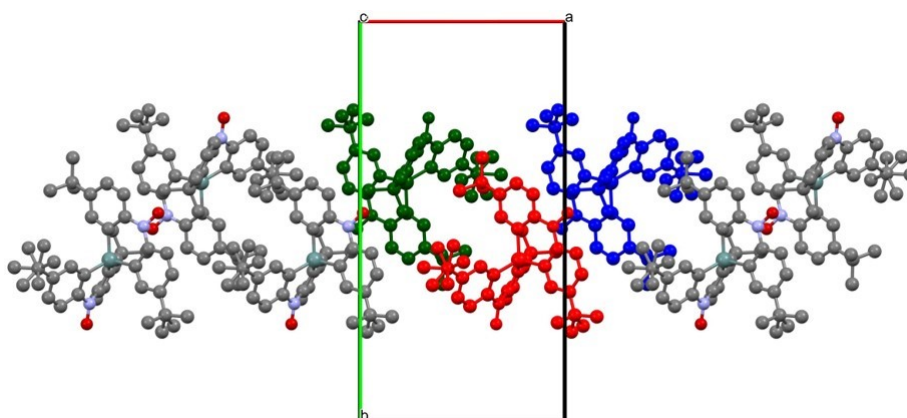

c)

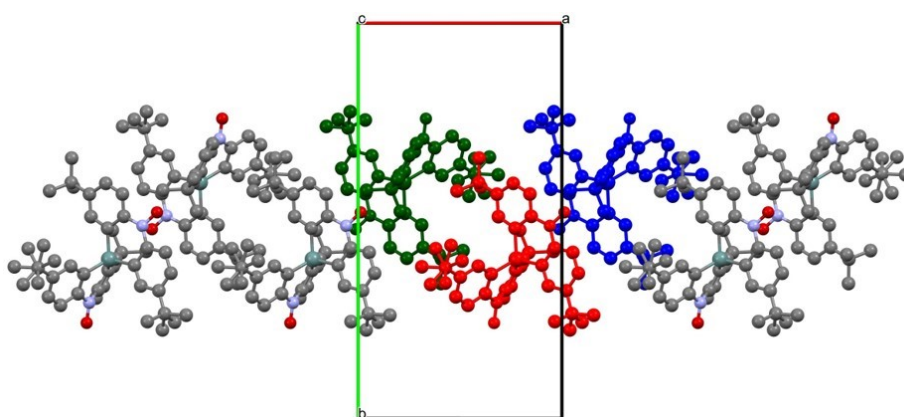

**Fig. S6.** One-dimensional structures along the *a*-axis, formed by the combination of the dimers (i) and (ii), as shown in Figs. S4 and S5, respectively, along the *c*-axis at (a) 220, (b) 250 and (c) 280 K. Red, blue and green molecules represent  $x,y,z$ ,  $2-x$ ,  $1-y$ ,  $1-z$  and  $1-x$ ,  $1-y$ ,  $1-z$ , respectively.

**Table S5.** Intermolecular structural parameters.

| <i>T</i> / K    | 93 <sup>a</sup> | 220      | 250      | 280     |
|-----------------|-----------------|----------|----------|---------|
| C14···C14 / Å   | 3.475(2)        | 3.432(4) | 3.270(7) | 3.25(1) |
| C14A···C19 / Å  | ---             | ---      | 3.82(2)  | 3.78(2) |
| C14A···C36 / Å  | ---             | ---      | 3.74(2)  | 3.75(2) |
| C15A···C18 / Å  | ---             | ---      | 3.43(2)  | 3.50(2) |
| C16A···C38 / Å  | ---             | ---      | 3.76(2)  | 3.80(2) |
| C16A···C39A / Å | ---             | ---      | 3.85(5)  | 3.89(6) |
| C20···C39 / Å   | 3.828(3)        | 3.885(6) | 3.85(2)  | 3.87(2) |
| C38···C39A / Å  | ---             | ---      | 3.82(2)  | 3.76(4) |
| C39···C40 / Å   | 3.709(3)        | 3.745(7) | 3.85(2)  | 3.86(2) |
| C39A···C40 / Å  | ---             | ---      | 3.83(4)  | 3.85(5) |

<sup>a</sup> Ref. [S1].**Table S6.** The energy levels and  $\langle S^2 \rangle$  in the triplet and singlet spin states for **1-Ge** at 280 K.

| Spin states            | <i>E</i> / au  | $\langle S^2 \rangle$ |
|------------------------|----------------|-----------------------|
| <i>S</i> = 1 (triplet) | -3889.83608456 | 2.0004                |
| <i>S</i> = 0 (singlet) | -3889.83604686 | 0.2017                |

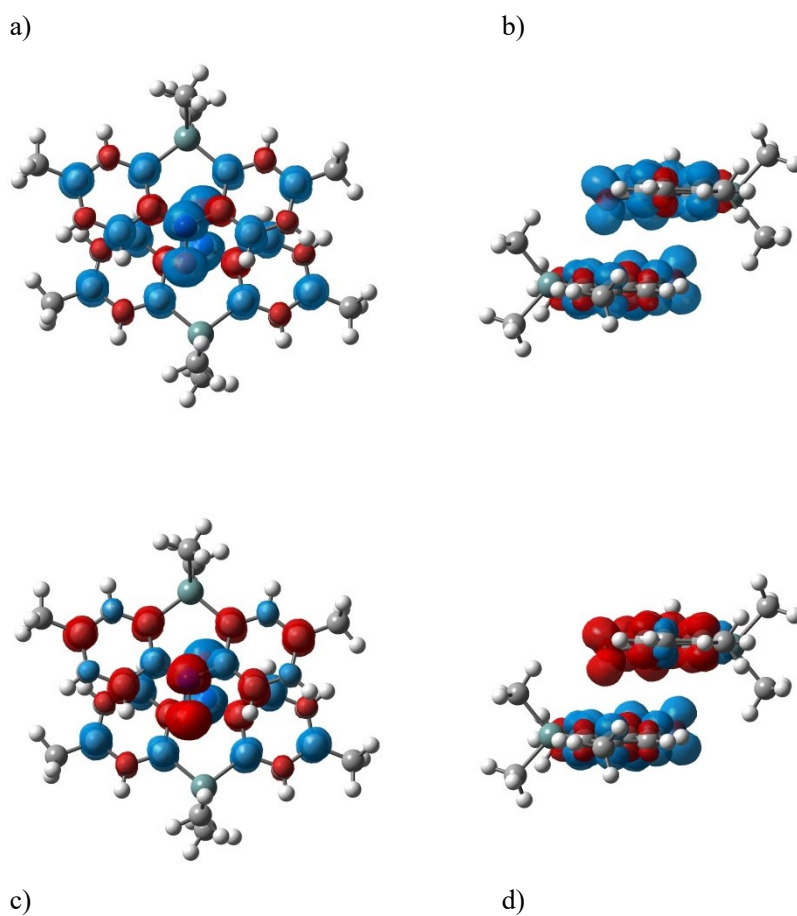

**Fig. S7.** Spin density maps drawn from the DFT MO calculations accompanied with the dimer (i) in **1-Ge** in the (a, b) triplet and (c, d) singlet states. The geometrical parameters are from the crystallographic results. Blue and red lobes stand for positive and negative spin densities, respectively, with the isocontour of  $0.002 \text{ e } \text{\AA}^{-3}$ .

**Table S7.** The energy levels and  $\langle S^2 \rangle$  in the triplet and singlet spin states for **1-Ge** (dimer) at 280 K.

| Spin states       | $E / \text{au}$ | $\langle S^2 \rangle$ |
|-------------------|-----------------|-----------------------|
| $S = 1$ (triplet) | -5655.17586761  | 2.0006                |
| $S = 0$ (singlet) | -5655.17572579  | 0.2379                |

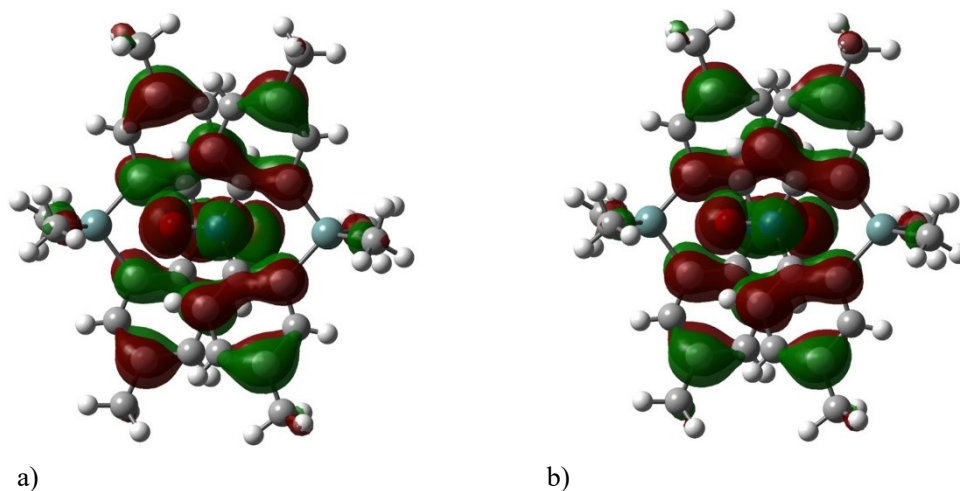

**Fig. S8.** The  $\alpha$  spin in two SOMOs, which are (a) #161 ( $-4.90$  eV) and (b) #162 ( $-5.06$  eV), for **1-Ge** with the isocontour of 0.02.

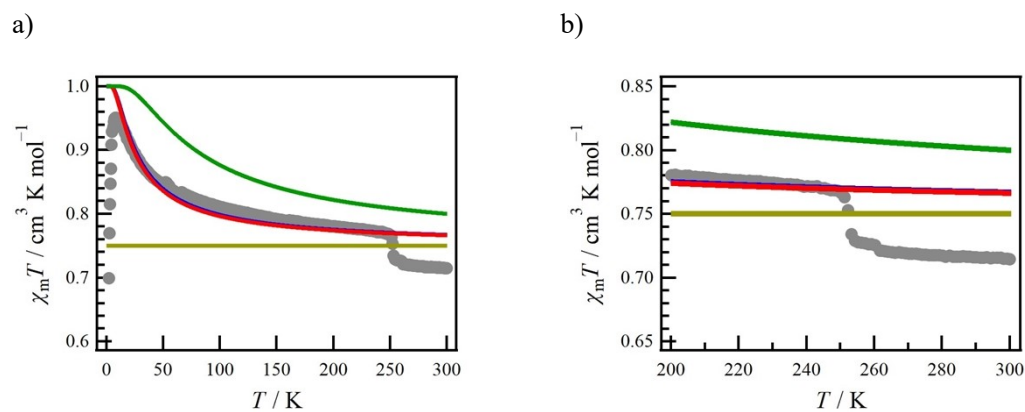

**Fig. S9.** (a) The experimental and simulated  $\chi_m T$  vs.  $T$  curves for **1-Ge**. The red, blue, green and yellow solid lines are derived from  $2J/k_B$  of  $+13.81$ ,  $+13.21$ ,  $+43$  and  $0$  K with  $g$ -value fixed at 2.0. (b) Extended view around the transition temperature.

**Table S8.** The energy levels and  $\langle S^2 \rangle$  in the triplet and singlet spin states for **1-Ge** (dimer) at 280 K.

|                | Spin states       | $E / \text{au}$ | $\langle S^2 \rangle$ | $2J k_B^{-1} / \text{K}$ |
|----------------|-------------------|-----------------|-----------------------|--------------------------|
| UB3LYP         | $S = 1$ (triplet) | -5655.17729113  | 2.0005                |                          |
| /6-311+g(2d,p) | $S = 0$ (singlet) | -5655.17729358  | 0.2121                | -0.865                   |
| UM06-X         | Triplet           | -5654.47169989  | 2.0005                |                          |
| /6-311+g(2d,p) | Singlet           | -5654.47170126  | 0.2220                | -0.486                   |

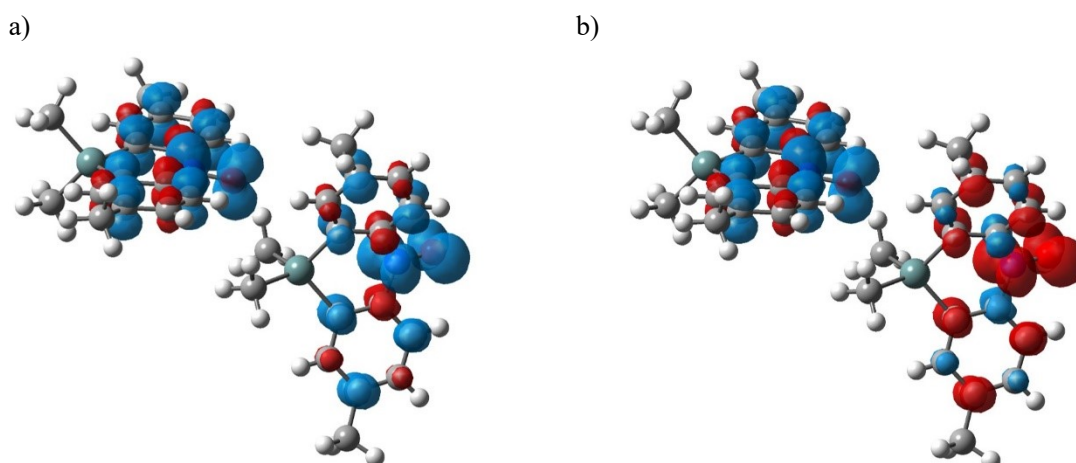

**Fig. S10.** Spin density maps drawn from the DFT MO calculations (UB3LYP/6-311+g(2d,p)) accompanied with the dimer through the CH $\cdots$ O contacts in **1-Ge** in the (a) triplet and (b) singlet states. The geometrical parameters are from the crystallographic results. Blue and red lobes stand for positive and negative spin densities, respectively, with the isocontour of  $0.002 \text{ e } \text{\AA}^{-3}$ .

**Table S9.** The energy levels and  $\langle S^2 \rangle$  in the triplet and singlet spin states for **1-Ge** (dimer) at 280 K dependent on parallel shift between the NO dimers (UB3LYP/6-31+g(d,p)).

| $d / \text{\AA}$ | Spin states       | $E / \text{au}$ | $\langle S^2 \rangle$ | $2J' k_B^{-1} / \text{K}$ |
|------------------|-------------------|-----------------|-----------------------|---------------------------|
| 0.000 (STD)      | $S = 1$ (triplet) | -5650.90482227  | 2.0006                |                           |
|                  | $S = 0$ (singlet) | -5650.90468881  | 0.2335                | +47.67                    |
| -0.075           | Triplet           | -5650.90497624  | 2.0006                |                           |
|                  | Singlet           | -5650.90488737  | 0.2334                | +31.742                   |
| -0.175           | Triplet           | -5650.90521614  | 2.0006                |                           |
|                  | Singlet           | -5650.90521755  | 0.2327                | -0.503                    |
| -0.275           | Triplet           | -5650.90546235  | 2.0006                |                           |
|                  | Singlet           | -5650.90558372  | 0.2316                | -43.306                   |
| -0.375           | Triplet           | -5650.90551745  | 2.0006                |                           |
|                  | Singlet           | -5650.90577935  | 0.2300                | -93.365                   |
| -0.475           | Triplet           | -5650.90556918  | 2.0006                |                           |
|                  | Singlet           | -5650.90597959  | 0.2281                | -146.150                  |
| -0.575           | Triplet           | -5650.90541943  | 2.0006                |                           |
|                  | Singlet           | -5650.90597203  | 0.2262                | -196.574                  |
| +0.125           | Triplet           | -5650.90461648  | 2.0006                |                           |
|                  | Singlet           | -5650.90445373  | 0.2330                | +58.117                   |
| +0.225           | Triplet           | -5650.90449057  | 2.0006                |                           |
|                  | Singlet           | -5650.90434251  | 0.2321                | +52.844                   |
| +0.325           | Triplet           | -5650.90438063  | 2.0006                |                           |
|                  | Singlet           | -5650.90427408  | 0.2308                | +38.001                   |
| +0.425           | Triplet           | -5650.90427480  | 2.0006                |                           |
|                  | Singlet           | -5650.90422757  | 0.2293                | +16.830                   |
| +0.525           | Triplet           | -5650.90417635  | 2.0006                |                           |
|                  | Singlet           | -5650.90419600  | 0.2279                | -6.997                    |
| +0.625           | Triplet           | -5650.90418227  | 2.0005                |                           |
|                  | Singlet           | -5650.90426607  | 0.2267                | -29.820                   |

**Table S10.** The energy levels and  $\langle S^2 \rangle$  in the triplet and singlet spin states for **1-Ge** (dimer) at 280 K dependent on vertical shift between the NO dimers (UB3LYP/6-31+g(d,p)).

| $d / \text{\AA}$ | Spin states       | $E / \text{au}$ | $\langle S^2 \rangle$ | $2J' k_B^{-1} / \text{K}$ |
|------------------|-------------------|-----------------|-----------------------|---------------------------|
| 0.000 (STD)      | $S = 1$ (triplet) | -5650.90482227  | 2.0006                |                           |
|                  | $S = 0$ (singlet) | -5650.90468881  | 0.2335                | +47.67                    |
| -0.0956          | Triplet           | -5650.90346575  | 2.0006                |                           |
|                  | Singlet           | -5650.90326317  | 0.2337                | +72.369                   |
| -0.1956          | Triplet           | -5650.90160106  | 2.0006                |                           |
|                  | Singlet           | -5650.90129831  | 0.2338                | +108.159                  |
| -0.2956          | Triplet           | -5650.89878713  | 2.0006                |                           |
|                  | Singlet           | -5650.89834612  | 0.2337                | +157.545                  |
| +0.1044          | Triplet           | -5650.90582661  | 2.0006                |                           |
|                  | Singlet           | -5650.90574654  | 0.2331                | +28.594                   |
| +0.2044          | Triplet           | -5650.90650903  | 2.0006                |                           |
|                  | Singlet           | -5650.90646313  | 0.2328                | +16.389                   |
| +0.3044          | Triplet           | -5650.90690688  | 2.0006                |                           |
|                  | Singlet           | -5650.90688206  | 0.2324                | +8.860                    |

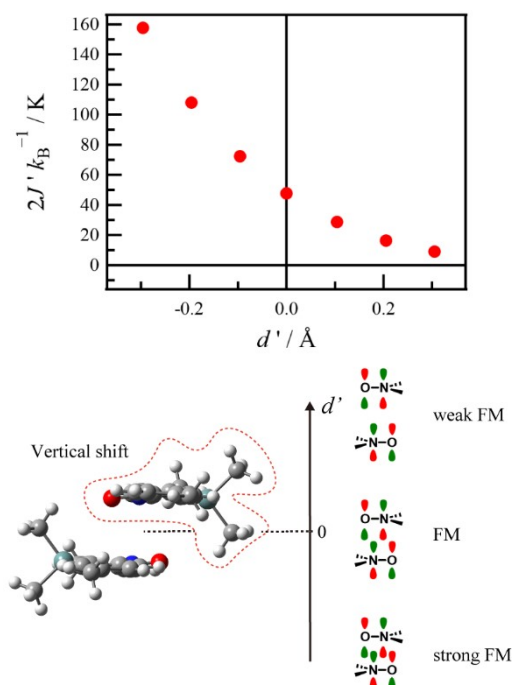

**Fig. S11.** Intermolecular interaction constants  $2J'/k_B$  dependent on vertical shift between the NO dimers in the HTP state.



## References

- S1. S. Ogawa, T. Kanetomo, M. Enomoto, Spiro-centre substitution effects in intramolecular spin-spin interactions of spirobiacridine diradicals, *Org. Chem. Front.*, 2024, **11**, 3004–3011.
